# Supplementary material for: IGF-1R and mTOR Blockade: Novel Resistance Mechanisms and Synergistic Drug Combinations for Ewing Sarcoma
Source: Oxford University Press journal article supplement (doi:10.1093/jnci/djw182), 2016-08-30
Supplement: 2706935_Supplementary_Data.zip [file 2706935_Supplementary_Data.zip]

## SUPPLEMENTARY MATERIALS AND METHODS

### Antibodies.

The antibodies used in western blots are listed below

| <b>Antibodies</b>                                                                                                                                                                                                                                                                                                                                                                                                                                                 | <b>Company</b>              |
|-------------------------------------------------------------------------------------------------------------------------------------------------------------------------------------------------------------------------------------------------------------------------------------------------------------------------------------------------------------------------------------------------------------------------------------------------------------------|-----------------------------|
| p38 MAPK14, p38 MAPK14-T180-82, IGF1R- $\beta$ , IR- $\beta$ , pIGF1R-T980, Cyclin-D1, pPI3K-110 $\alpha$ , PTEN, $\beta$ -actin, Notch4, IRS-1, AKT, VEGFR2, IGFBP-2, Tuberin, Bax, Tau, pMAPK-T202/204, pSRC-Y416, SRC, Beclin, pAKT-S473, pcMET-Y1235, pAKT-T308, EEf2K, AMPK- $\alpha$ , PRAS40, pYB-1-S102, pmTOR-S244-48, pS6-S235/236, pS6-S240/244, p70S6K-T389, Gab2, Bad, Rictor, Raptor, MEK-1/2, pFOXO3a-S318/321, eIF4E, pEIF4E-S209 and pSTAT3-Y705 | Cell Signaling Technologies |
| FLI1, HER3, and PI3K-85                                                                                                                                                                                                                                                                                                                                                                                                                                           | Santa Cruz Biotechnology    |
| RNA helicase A, SMAD-3, c-Kit, DHFR, and CD-239, pIGF-1R-Y1131, Smad3, pSmad-S423-425                                                                                                                                                                                                                                                                                                                                                                             | Abcam                       |
| Stat3                                                                                                                                                                                                                                                                                                                                                                                                                                                             | Santa Cruz                  |
| PKC $\alpha$ , pPKC-S657, PARK7-DJ-1, and p-Her2(Y1248)                                                                                                                                                                                                                                                                                                                                                                                                           | EMD Millipore               |
| Wnt-8 $\beta$ and ADAM-8                                                                                                                                                                                                                                                                                                                                                                                                                                          | LS Biosciences              |

Proteins analyzed in RPPA panels

| <b>#</b> | <b>Official Ab Name</b>     | <b>Ab Name Reported on Dataset</b> | <b>Gene Name</b>  | <b>Company</b> |
|----------|-----------------------------|------------------------------------|-------------------|----------------|
| 1        | 14-3-3 beta                 | 14-3-3-beta                        | YWHAB             | Santa Cruz     |
| 2        | 14-3-3 epsilon              | 14-3-3-epsilon                     | YWHAE             | Santa Cruz     |
| 3        | 14-3-3 zeta                 | 14-3-3-zeta                        | YWHAZ             | Santa Cruz     |
| 4        | 4E-BP1                      | 4E-BP1                             | EIF4EBP1          | CST            |
| 5        | 4E-BP1_pS65                 | 4E-BP1_pS65                        | EIF4EBP1          | CST            |
| 6        | 4E-BP1_pT37_T46             | 4E-BP1_pT37_T46                    | EIF4EBP1          | CST            |
| 7        | 53BP1                       | 53BP1                              | TP53BP1           | CST            |
| 8        | Acetyl CoA Carboxylase 1    | ACC1                               | ACACA             | Epitomics      |
| 9        | Acetyl-CoA Carboxylase_pS79 | ACC_pS79                           | ACACA<br>ACACB    | CST            |
| 10       | ACVRL1                      | ACVRL1                             | ACVRL1            | Abcam          |
| 11       | ADAR1                       | ADAR1                              | ADAR              | Abcam          |
| 12       | Akt                         | Akt                                | AKT1 AKT2<br>AKT3 | CST            |
| 13       | Akt_pS473                   | Akt_pS473                          | AKT1 AKT2<br>AKT3 | CST            |
| 14       | Akt_pT308                   | Akt_pT308                          | AKT1 AKT2<br>AKT3 | CST            |
| 15       | AMPK $\alpha$               | AMPK-alpha                         | PRKAA1            | CST            |
| 16       | AMPK $\alpha$ _pT172        | AMPK-alpha_pT172                   | PRKAA1            | CST            |
| 17       | Androgen Receptor           | AR                                 | AR                | Epitomics      |
| 18       | Annexin I                   | Annexin-I                          | ANXA1             | BD Biosciences |
| 19       | Annexin VII                 | Annexin-VII                        | ANXA7             | BD Biosciences |

| #  | Official Ab Name      | Ab Name Reported on Dataset | Gene Name     | Company             |
|----|-----------------------|-----------------------------|---------------|---------------------|
| 20 | A-Raf                 | A-Raf                       | ARAF          | CST                 |
| 21 | ARHI                  | ARHI                        | DIRAS3        | MDACC<br>Laboratory |
| 22 | ATM                   | ATM                         | ATM           | CST                 |
| 23 | ATM_pS1981            | ATM_pS1981                  | ATM           | CST                 |
| 24 | ATP5H                 | ATP5H                       | ATP5H         | Abcam               |
| 25 | ATR                   | ATR                         | ATR           | CST                 |
| 26 | Bad_pS112             | Bad_pS112                   | BAD           | CST                 |
| 27 | Bak                   | Bak                         | BAK1          | Epitomics           |
| 28 | BAP1                  | BAP1                        | BAP1          | Santa Cruz          |
| 29 | Bax                   | Bax                         | BAX           | CST                 |
| 30 | BCL2                  | Bcl2                        | BCL2          | Dako                |
| 31 | Bcl-xL                | Bcl-xL                      | BCL2L1        | CST                 |
| 32 | Beclin                | Beclin                      | BECN1         | Santa Cruz          |
| 33 | beta-Catenin          | b-Catenin                   | CTNNB1        | CST                 |
| 34 | beta-Catenin_pT41_S45 | b-Catenin_pT41_S45          | CTNNB1        | CST                 |
| 35 | Bid                   | Bid                         | BID           | Abcam               |
| 36 | Bim                   | Bim                         | BCL2L11       | Abcam               |
| 37 | B-Raf                 | B-Raf                       | BRAF          | Santa Cruz          |
| 38 | B-Raf_pS445           | B-Raf_pS445                 | BRAF          | CST                 |
| 39 | BRCA2                 | BRCA2                       | BRCA2         | CST                 |
| 40 | Caspase-7 cleavedD198 | Caspase-7-cleaved           | CASP7         | CST                 |
| 41 | Caspase-8             | Caspase-8                   | CASP8         | CST                 |
| 42 | Caveolin-1            | Caveolin-1                  | CAV1          | CST                 |
| 43 | CD29                  | CD29                        | ITGB1         | BD Biosciences      |
| 44 | CD31                  | CD31                        | PECAM1        | Dako                |
| 45 | CD49b                 | CD49b                       | ITGA2         | BD Biosciences      |
| 46 | cdc2/CDK1             | CDK1                        | CDC2-<br>CDK1 | CST                 |
| 47 | CDKN2A/p16INK4a       | p16INK4a                    | CDKN2A        | Abcam               |
| 48 | Chk1                  | Chk1                        | CHEK1         | CST                 |
| 49 | Chk1_pS345            | Chk1_pS345                  | CHEK1         | CST                 |
| 50 | Chk2                  | Chk2                        | CHEK2         | CST                 |
| 51 | Chk2_pT68             | Chk2_pT68                   | CHEK2         | CST                 |
| 52 | c-Jun_pS73            | c-Jun_pS73                  | JUN           | CST                 |
| 53 | c-Kit                 | c-Kit                       | KIT           | Abcam               |
| 54 | Claudin 7             | Claudin-7                   | CLDN7         | Novus Biologicals   |
| 55 | c-Met                 | c-Met                       | MET           | CST                 |
| 56 | c-Met_pY1234_Y1235    | c-Met_pY1234_Y1235          | MET           | CST                 |
| 57 | c-Myc                 | c-Myc                       | MYC           | Santa Cruz          |
| 58 | COL6A1                | Collagen-VI                 | COL6A1        | Santa Cruz          |
| 59 | Complex II Subunit    | Complex-II-Subunit          | SDHA          | Invitrogen          |
| 60 | Cox IV                | Cox-IV                      | COX4I1        | Abcam               |
| 61 | Cox2                  | Cox2                        | PTGS2         | CST                 |
| 62 | C-Raf/Raf-1           | C-Raf                       | RAF1          | Millipore           |
| 63 | C-Raf_pS338           | C-Raf_pS338                 | RAF1          | CST                 |
| 64 | Cyclin B1             | Cyclin-B1                   | CCNB1         | Epitomics           |
| 65 | Cyclin D1             | Cyclin-D1                   | CCND1         | Santa Cruz          |
| 66 | Cyclin E1             | Cyclin-E1                   | CCNE1         | Santa Cruz          |
| 67 | Cyclophilin F         | Cyclophilin-F               | PPIF          | Abcam               |

| #   | Official Ab Name        | Ab Name Reported on Dataset | Gene Name      | Company           |
|-----|-------------------------|-----------------------------|----------------|-------------------|
| 68  | Dvl3                    | Dvl3                        | DVL3           | CST               |
| 69  | E2F-1                   | E2F1                        | E2F1           | Santa Cruz        |
| 70  | E-Cadherin              | E-Cadherin                  | CDH1           | CST               |
| 71  | eEF2                    | eEF2                        | EEF2           | CST               |
| 72  | eEF2K                   | eEF2K                       | EEF2K          | CST               |
| 73  | EGFR                    | EGFR                        | EGFR           | CST               |
| 74  | EGFR_pY1068             | EGFR_pY1068                 | EGFR           | CST               |
| 75  | EGFR_pY1173             | EGFR_pY1173                 | EGFR           | Abcam             |
| 76  | eIF4E                   | eIF4E                       | EIF4E          | CST               |
| 77  | eIF4G                   | eIF4G                       | EIF4G1         | CST               |
| 78  | ER alpha_pS118          | ER-alpha_pS118              | ESR1           | Epitomics         |
| 79  | ErbB2/HER2              | HER2                        | ERBB2          | Lab Vision        |
| 80  | ErbB2/HER2_pY1248       | HER2_pY1248                 | ERBB2          | R&D Systems       |
| 81  | ErbB3/HER3              | HER3                        | ERBB3          | Santa Cruz        |
| 82  | ErbB3/HER3_pY1289       | HER3_pY1289                 | ERBB3          | CST               |
| 83  | ERCC1                   | ERCC1                       | ERCC1          | Santa Cruz        |
| 84  | ERRFI1/MIG6             | MIG6                        | ERRFI1         | Sigma-Aldrich     |
| 85  | Estrogen Receptor       | ER-alpha                    | ESR1           | Lab Vision        |
| 86  | Ets-1                   | Ets-1                       | ETS1           | Bethyl            |
| 87  | FAK                     | FAK                         | PTK2           | CST               |
| 88  | FAK_pY397               | FAK_pY397                   | PTK2           | CST               |
| 89  | Fatty Acid Synthase     | FASN                        | FASN           | CST               |
| 90  | Fibronectin             | Fibronectin                 | FN1            | Epitomics         |
| 91  | FoxM1                   | FoxM1                       | FOXO3          | CST               |
| 92  | FoxO3a                  | FoxO3a                      | FOXO3          | CST               |
| 93  | FoxO3a_pS318_S321       | FoxO3a_pS318_S321           | FOXO3          | CST               |
| 94  | G6PD                    | G6PD                        | G6PD           | Santa Cruz        |
| 95  | Gab2                    | Gab2                        | GAB2           | CST               |
| 96  | GAPDH                   | GAPDH                       | GAPDH          | Life Technologies |
| 97  | GATA3                   | GATA3                       | GATA3          | BD Biosciences    |
| 98  | GCN5L2                  | GCN5L2                      | KAT2A          | CST               |
| 99  | Glycogen Synthase       | Gys                         | GYS1           | CST               |
| 100 | Glycogen Synthase_pS641 | Gys_pS641                   | GYS1           | CST               |
| 101 | GPBB                    | GPBB                        | PYGB           | Novus Biologicals |
| 102 | GSK-3alpha/beta         | GSK-3ab                     | GSK3A<br>GSK3B | Santa Cruz        |
| 103 | GSK-3alpha/beta_pS21_S9 | GSK-3ab_pS21_S9             | GSK3A<br>GSK3B | CST               |
| 104 | GSK-3beta_pS9           | GSK-3b_pS9                  | GSK3B          | CST               |
| 105 | Heregulin               | Heregulin                   | NRG1           | CST               |
| 106 | HIAP                    | HIAP                        | BIRC2          | Millipore         |
| 107 | Histone H3              | Histone-H3                  | H3F3A<br>H3F3B | Abcam             |
| 108 | IGF-1Receptor beta      | IGF1R-beta                  | IGF1R          | CST               |
| 109 | IGFBP2                  | IGFBP2                      | IGFBP2         | CST               |
| 110 | INPP4b                  | INPP4b                      | INPP4B         | CST               |
| 111 | IRS1                    | IRS1                        | IRS1           | Millipore         |
| 112 | JAB1                    | JAB1                        | COPS5          | Santa Cruz        |
| 113 | JNK/SAPK_pT183_Y185     | JNK_pT183_Y185              | MAPK8          | CST               |
| 114 | JNK2                    | JNK2                        | MAPK9          | CST               |

| #   | Official Ab Name      | Ab Name Reported on Dataset | Gene Name        | Company           |
|-----|-----------------------|-----------------------------|------------------|-------------------|
| 115 | KMT3A/HYPB/HIF 1      | SETD2                       | SETD2            | Abcam             |
| 116 | Lck                   | Lck                         | LCK              | CST               |
| 117 | MAPK_pT202_Y204       | MAPK_pT202_Y204             | MAPK1<br>MAPK3   | CST               |
| 118 | Mcl 1                 | Mcl-1                       | MCL1             | CST               |
| 119 | MDM2_pS166            | MDM2_pS166                  | MDM2             | CST               |
| 120 | MEK1                  | MEK1                        | MAP2K1           | Epitomics         |
| 121 | MEK1_pS217_S221       | MEK1_pS217_S221             | MAP2K1<br>MAP2K2 | CST               |
| 122 | MEK2                  | MEK2                        | MAP2K2           | CST               |
| 123 | Merlin/NF2            | Merlin                      | NF2              | Novus Biologicals |
| 124 | MSH2                  | MSH2                        | MSH2             | CST               |
| 125 | MSH6                  | MSH6                        | MSH6             | Novus Biologicals |
| 126 | mTOR                  | mTOR                        | MTOR             | CST               |
| 127 | mTOR_pS2448           | mTOR_pS2448                 | MTOR             | CST               |
| 128 | Myosin heavy chain 11 | Myosin-11                   | MYH11            | Novus Biologicals |
| 129 | Myosin IIa_pS1943     | Myosin-IIa_pS1943           | MYH9             | CST               |
| 130 | NAPSIN A              | NAPSIN-A                    | NAPSA            | Abcam             |
| 131 | N-Cadherin            | N-Cadherin                  | CDH2             | CST               |
| 132 | NDRG1_pT346           | NDRG1_pT346                 | NDRG1            | CST               |
| 133 | NF-kappaB p65_pS536   | NF-kB-p65_pS536             | RELA             | CST               |
| 134 | Notch1                | Notch1                      | NOTCH1           | CST               |
| 135 | N-Ras                 | N-Ras                       | NRAS             | Santa Cruz        |
| 136 | p21                   | p21                         | CDKN1A           | Santa Cruz        |
| 137 | p27 KIP 1             | p27-Kip-1                   | CDKN1B           | Abcam             |
| 138 | p27 KIP 1_pT198       | p27_pT198                   | CDKN1B           | Abcam             |
| 139 | p27/Kip1_pT157        | p27_pT157                   | CDKN1B           | R&D Systems       |
| 140 | p38 alpha MAPK        | p38-alpha                   | MAPK14           | CST               |
| 141 | p38 MAPK              | p38                         | MAPK14           | CST               |
| 142 | p38 MAPK_pT180_Y182   | p38_pT180_Y182              | MAPK14           | CST               |
| 143 | p53                   | p53                         | TP53             | CST               |
| 144 | p70 S6 Kinase_pT389   | p70-S6K_pT389               | RPS6KB1          | CST               |
| 145 | p70/S6K1              | p70-S6K1                    | RPS6KB1          | Epitomics         |
| 146 | PAI-1                 | PAI-1                       | SERPINE1         | BD Biosciences    |
| 147 | PARK7/DJ1             | DJ1                         | PARK7            | Abcam             |
| 148 | PARP cleavedD214      | PARP-cleaved                | PARP1            | CST               |
| 149 | PARP-1                | PARP1                       | PARP1            | Santa Cruz        |
| 150 | Paxillin              | Paxillin                    | PXN              | Epitomics         |
| 151 | PCNA                  | PCNA                        | PCNA             | Abcam             |
| 152 | Pcdcd-1L1             | Pcdcd-1L1                   | CD274            | Santa Cruz        |
| 153 | Pcdcd4                | Pcdcd4                      | PDCD4            | Rockland          |
| 154 | PDGFR beta            | PDGFR-beta                  | PDGFRB           | CST               |
| 155 | PDK1                  | PDK1                        | PDPK1            | CST               |



| #   | Official Ab Name      | Ab Name Reported on Dataset | Gene Name                                          | Company           |
|-----|-----------------------|-----------------------------|----------------------------------------------------|-------------------|
| 156 | PDK1_pS241            | PDK1_pS241                  | PDPK1                                              | CST               |
| 157 | PEA-15                | PEA-15                      | PEA15                                              | CST               |
| 158 | PED/PEA-15_pS116      | PEA-15_pS116                | PEA15                                              | Invitrogen        |
| 159 | PI3 Kinase p110 alpha | PI3K-p110-alpha             | PIK3CA                                             | CST               |
| 160 | PI3K p85              | PI3K-p85                    | PIK3R1                                             | Millipore         |
| 161 | PKC alpha             | PKC-alpha                   | PRKCA                                              | Millipore         |
| 162 | PKC alpha_pS657       | PKC-alpha_pS657             | PRKCA                                              | Millipore         |
| 163 | PKC beta II_pS660     | PKC-beta-II_pS660           | PRKCA<br>PRKCB<br>PRKCD<br>PRKCE<br>PRKCH<br>PRKCQ | CST               |
| 164 | PKC delta_pS664       | PKC-delta_pS664             | PRKCD                                              | Millipore         |
| 165 | PMS2                  | PMS2                        | PMS2                                               | Novus Biologicals |
| 166 | PRAS40_pT246          | PRAS40_pT246                | AKT1S1                                             | Life Technologies |
| 167 | PREX1                 | PREX1                       | PREX1                                              | Abcam             |
| 168 | Progesterone Receptor | PR                          | PGR                                                | Abcam             |
| 169 | PTEN                  | PTEN                        | PTEN                                               | CST               |
| 170 | Rab11                 | Rab11                       | RAB11A<br>RAB11B                                   | CST               |
| 171 | Rab25                 | Rab25                       | RAB25                                              | CST               |
| 172 | Rad50                 | Rad50                       | RAD50                                              | Millipore         |
| 173 | Rad51                 | Rad51                       | RAD51                                              | CST               |
| 174 | Raptor                | Raptor                      | RPTOR                                              | CST               |
| 175 | Rb                    | Rb                          | RB1                                                | CST               |
| 176 | Rb_pS807_S811         | Rb_pS807_S811               | RB1                                                | CST               |
| 177 | RBM15                 | RBM15                       | RBM15                                              | Novus Biologicals |
| 178 | Rictor                | Rictor                      | RICTOR                                             | CST               |
| 179 | Rictor_pT1135         | Rictor_pT1135               | RICTOR                                             | CST               |
| 180 | RSK                   | RSK                         | RPS6KA1<br>RPS6KA2<br>RPS6KA3                      | CST               |
| 181 | S6_pS235_S236         | S6_pS235_S236               | RPS6                                               | CST               |
| 182 | S6_pS240_S244         | S6_pS240_S244               | RPS6                                               | CST               |
| 183 | SCD                   | SCD                         | SCD                                                | Santa Cruz        |
| 184 | SF2/ASF               | SF2                         | SRSF1                                              | Invitrogen        |
| 185 | Shc_pY317             | Shc_pY317                   | SHC1                                               | CST               |
| 186 | Smac/Diablo           | Smac                        | DIABLO                                             | CST               |
| 187 | Smad1                 | Smad1                       | SMAD1                                              | Epitomics         |
| 188 | Smad3                 | Smad3                       | SMAD3                                              | Abcam             |
| 189 | Smad4                 | Smad4                       | SMAD4                                              | Santa Cruz        |
| 190 | Snail                 | Snail                       | SNAI1                                              | CST               |
| 191 | Src                   | Src                         | SRC                                                | Millipore         |

| #   | Official Ab Name     | Ab Name Reported on Dataset | Gene Name                               | Company           |
|-----|----------------------|-----------------------------|-----------------------------------------|-------------------|
| 192 | Src Family_pY416     | Src_pY416                   | SRC<br>LYN<br>FYN<br>LCK<br>YES1<br>HCK | CST               |
| 193 | Src_pY527            | Src_pY527                   | SRC<br>YES1<br>FYN<br>FGR               | CST               |
| 194 | Stat3_pY705          | Stat3_pY705                 | STAT3                                   | CST               |
| 195 | Stat5a               | Stat5a                      | STAT5A                                  | Abcam             |
| 196 | Stathmin 1           | Stathmin-1                  | STMN1                                   | Abcam             |
| 197 | Syk                  | Syk                         | SYK                                     | Santa Cruz        |
| 198 | TAZ                  | TAZ                         | WWTR1                                   | CST               |
| 199 | TIGAR                | TIGAR                       | C12ORF5                                 | Abcam             |
| 200 | Transferrin Receptor | TFRC                        | TFRC                                    | Novus Biologicals |
| 201 | Transglutaminase II  | Transglutaminase            | TGM2                                    | Lab Vision        |
| 202 | TSC1/Hamartin        | TSC1                        | TSC1                                    | CST               |
| 203 | TSC2 Tuberin_pT1462  | Tuberin_pT1462              | TSC2                                    | CST               |
| 204 | TTF1                 | TTF1                        | NKX2-1                                  | Abcam             |
| 205 | Tuberin              | Tuberin                     | TSC2                                    | Epitomics         |
| 206 | Twist                | TWIST                       | TWIST2                                  | Santa Cruz        |
| 207 | Tyro3                | Tyro3                       | TYRO3                                   | CST               |
| 208 | UBAC1                | UBAC1                       | UBAC1                                   | Sigma-Aldrich     |
| 209 | UGT1A                | UGT1A                       | UGT1A1                                  | Santa Cruz        |
| 210 | UQCRC2               | UQCRC2                      | UQCRC2                                  | Abcam             |
| 211 | VDAC1/Porin          | Porin                       | VDAC1                                   | Abcam             |
| 212 | VEGF Receptor 2      | VEGFR-2                     | KDR                                     | CST               |
| 213 | VHL                  | VHL                         | VHL                                     | BD Biosciences    |
| 214 | XRCC1                | XRCC1                       | XRCC1                                   | CST               |
| 215 | YAP                  | YAP                         | YAP1                                    | Santa Cruz        |
| 216 | YAP_pS127            | YAP_pS127                   | YAP1                                    | CST               |
| 217 | YB1                  | YB1                         | YBX1                                    | Novus Biologicals |
| 218 | YB1_pS102            | YB1_pS102                   | YBX1                                    | CST               |

## Cell lines

ES cell lines A4573, TC32 and TC71 were maintained in RPMI 1640 medium (Mediatech; Manassas, VA) containing 10% (vol/vol) fetal bovine serum (Gemini Bio-

Products; Sacramento, CA) and antibiotics (100 IU/ml penicillin and 100 mg/ml streptomycin [Mediatech]) in a humidified incubator at 37°C in a 5% CO<sub>2</sub> atmosphere.

### **Preparation of drug stock solutions**

For in vivo applications, the primary stock solution of ridaforolimus (10 mg/ml. Merck; Kenilworth, NJ) was prepared in N,N-dimethyl acetamide and stored at -80°C. The working concentrations of ridaforolimus were prepared as needed by diluting the stock solution (10%) in vehicle comprising 10% Tween 80, 40% polyethylene glycol-400, and 40% sterile water. The primary stock solution of dalotuzumab was supplied by Merck at a concentration of 20.16 mg/ml in vehicle containing 20 mM L-histidine, 150 mM NaCl, and 0.5% (w:w) polysorbate 80 (pH 6). The working concentrations of dalotuzumab were prepared in the same formulation buffer. The primary stock solution of CGP57380 (150 mg/ml. Selleckchem; Houston, TX) for in vivo applications was prepared in N,N-dimethyl acetamide and stored at -80°C. The working concentrations of CGP57380 (1.2 mgX5 per week in IP injection) were prepared as needed by diluting the stock solution (10%) in vehicle comprising 10% Tween 80, 40% polyethylene glycol-400, and 40% sterile water. The primary stock solution of alpelisib (Novartis, 15 mg/ml) for in vivo applications was prepared in 0.5% carboxymethylcellulose sodium salt and stored at -80°C. The working concentrations of alpelisib were 1.5 mg/dose (5 days per week) in oral gavage. For in vitro applications, ridaforolimus (5.05 mM), OSI-906 (Selleckchem; 11.86 mM), dasatinib (Selleckchem; 10 mM), CGP57380 (Selleckchem; 10 mM), WP1722 (10mM. Produced in the lab of Dr. Waldemar Priebe. MDACC; Houston,

TX) and NVP-ADW-742 (Seleckchem; 11.02 mM) stock solutions were prepared in dimethyl sulfoxide (DMSO) and stored at -20°C.

### **Generation of ES clones with acquired drug resistance**

TC32 and TC71 ES clones with acquired resistance to OSI-906, NVP-ADW-742, or ridaforolimus were generated by maintaining the corresponding parental cell lines with increasing concentrations of the agents (up to 2.3  $\mu$ M for OSI-906, 1.5  $\mu$ M for NVP-ADW-742, and 50  $\mu$ M for ridaforolimus) for 7 months. All parental and acquired drug resistant cell lines were tested twice per year for mycoplasma contamination using the MycoAlert Detection Kit (Lonza Group Ltd.; Allendale, NJ) according to the manufacturer's protocol and validated using short-tandem repeat fingerprinting with an AmpFLSTR Identifier kit as previously described[39].

### **Assessment of cell viability (colorimetric methods and flow cytometry).**

Cell viability was measured using a colorimetric assay as previously described, using the following drug concentrations: 0.0004-15  $\mu$ M for OSI-906 and NVP-ADW-742; 0.003-200  $\mu$ M for ridaforolimus; 0.3125-40  $\mu$ M for dasatinib; and 1.25-40  $\mu$ M for CGP57380)[39]. IC<sub>50</sub> values from three replicated experiments were calculated by performing sigmoidal dose-response curve fitting using the Graph-Pad Prism version 6.0 software program. The apoptosis and proliferation of drug-resistant ES clones were indirectly assessed using Annexin V/propidium iodide staining and Ki67 intracellular labeling, respectively[39]. Cytometry data were acquired using a FACSCanto II flow

cytometer (BD Biosciences; San Jose, CA) and analyzed using the FlowJo version 10.0.6 software program (Tree Star; Ashland, OR).

### **In vitro assessment of cell line drug resistance**

Colony formation assays were used to assess cells' drug resistance. Drug-sensitive ES cells and drug-resistant ES clones in media were seeded in 6-well plates at 200 cells/well. After 24 hours, the cells were treated with the indicated concentrations of the drugs and then allowed to grow in media for 2 weeks. The cell colonies were then fixed with methanol, stained with crystal violet, and counted manually.

### **In vitro siRNA-based assays**

Short interfering RNAs (siRNAs) targeting human protein kinase C alpha (PKC- $\alpha$ ) and a non-specific universal negative control were obtained from Sigma-Aldrich (St Louis, MO). siRNAs were validated by assessing their protein expression with Western blotting as previously described[39]. Reverse transfections in 96-well plates were carried out using 40-nM siRNA with HiPerFect Transfection Reagent (Qiagen; Valencia, CA) in OptiMEM I Reduced Serum Medium (Life Technologies; Carlsbad, CA) according to the manufacturer's protocol. The adherently growing ES cells were cultivated for 24 hours after reverse transfection and then treated with fresh RPMI complete medium containing the indicated drugs in serial diluted concentrations for up to 72 hours. The effect of siRNA knockdown on the cells' drug resistance was assessed using the CellTiter-Blue cell viability assay (Promega; Madison, WI) according to the manufacturer's protocol.

Plates were read on a DTX 880 Multimode Detector microplate reader (Beckman Coulter; Indianapolis, IN).

### **Proteomic studies (western blots and reverse-phase protein arrays)**

The preparation of extracted proteins from cells or tumors for western blotting and reverse-phase protein lysate array (RPPA) analysis were prepared as described previously[33]. Western blotting and detection was performed using previously described methods[39]. Antibodies used are summarized in the supplemental Experimental Procedures. An RPPA analysis of drug-sensitive ES cells and drug-resistant ES clones or of EW5 and TC71 xenografts treated with dalotuzumab and/or ridaforolimus or control vehicle were performed simultaneously using the same array. Lysates were processed, spotted onto nitrocellulose-coated FAST slides, probed with 183 validated primary antibodies, and detected using earlier methods [39]. MicroVigene software program (VigeneTech) was used for automated spot identification, background correction, and individual spot-intensity determination. Expression data was normalized for possible unequal protein loading, taking into account the signal intensity for each sample for all antibodies tested. Log<sub>2</sub> values were media-centered by protein to account for variability in signal intensity by time and were calculated using the formula  $\log_2 \text{signal} - \log_2 \text{median}$ .

## **Generation of EW5 and TC71 ES xenografts and evaluation of dalotuzumab and/or ridaforolimus**

Male NOD (SCID)-IL-2Rg<sup>null</sup> mice (The Jackson Laboratory; Farmington, CT) were subcutaneously injected with TC71 cells ( $10^6$  cells/animal) or received EW5 explants (2 mm) to generate xenografts. All mice were maintained under barrier conditions and treated using protocols approved by The University of Texas MD Anderson Cancer Center's Institutional Animal Care and Use Committee (eACUF Protocol #03-11-02532) and Institutional Biosafety Committee (eIBC #HA0411-346-1).

Once their tumors reached a volume of  $150\text{ mm}^3$ , 6-9 mice per group received ridaforolimus (5 mg/kg daily, 5 times per week) and/or dalotuzumab (0.5 mg intraperitoneally twice weekly) or a placebo control (sterile vehicle buffer). Tumor volumes were measured using digital calipers at study initiation and 2–5 times per week thereafter for up to 35 days (TC71 xenografts), 73 days (EW5 xenografts), or until their tumors reached  $1500\text{ mm}^3$ , whichever came first. Of the 50 mice used in the experiments, three (5.7%; one in the ridaforolimus group and two in the ridaforolimus plus dalotuzumab) died within the first week of treatment, before their tumors reached  $1500\text{ mm}^3$ , likely because of the high volume of diluted ridaforolimus given ( $300\text{ }\mu\text{l/day}$ ). A Kaplan-Meier analysis was performed to assess drug efficacy. Statistical analyses between control and treated group or between different treated groups were performed with the log-rank (Mantel-Cox) test using Graph-Pad Prism 6.0 and are summarized in the Supplementary table 1.

### **Gene expression profiling and analysis**

Total RNA was extracted from EW5 xenograft tumors using the miRNeasy Mini Kit (Qiagen). RNA quality was assessed, and RNA was assigned an integrity number, before amplification and labeling using the GeneChip 3' IVT Express Kit (Affymetrix; Santa Clara, CA). Amplified and biotinylated cRNAs were hybridized onto Affymetrix GeneChip Human Genome U133A 2.0 cartridge arrays, then washed and stained per the manufacturer's instructions. Arrays were scanned using a GeneChip Scanner 3000 system, and the initial raw data were extracted using the GeneChip Command Console-Expression software (Affymetrix). The CEL files and extracted raw data were quantified using a robust multiarray analysis algorithm and normalized using median centering. EW5 xenograft-bearing mice treated with dalotuzumab or normotonic saline solution (control), were subjected to this genomic profiling and a t-test was used to assess differences between the two treatment groups. Unsupervised double hierarchical clustering used a Pearson correlation distance metric and Ward's linkage clustering method to separate six samples into two groups based upon expression of genes or expressed sequence tags (EST). Array data for dalotuzumab-treated and control EW5 xenografts (GSE67529) are available from the Gene Expression Omnibus repository.

### **Combination experiments and determination of synergy**

An  $IC_{50}$  isobologram analysis was performed using previously described methods to examine the dose dependent interaction between OSI-906 and dasatinib or between ridaforolimus and CGP57380 drug combinations on ES cell line sensitivity[39]. Drug synergy was determined using CalcuSyn software 2.1 (Biosoft; Cambridge, UK), which



analyzes the data from WST-1 proliferation assays to determine the interaction between equipotent drug combinations as compared to the concentration of single drug.

### **Immunohistochemical staining of relapsed ES patients tumor to IGF-1R/mTOR therapy**

Samples were obtained from patients undergoing surgical tumor resection under an institutional review board-approved protocol (# LAB08-0151) through the UT-MD-Anderson cancer center. All the patients provided written informed consent prior to surgical resection. Immunohistochemical staining was performed on formalin-fixed and paraffin-embedded (FFPE) tumor patient sections after deparafinization, antigen retrieval and blockade of endogenous peroxidase activity and total proteins. The primary antibodies diluted in the blocking buffers were added overnight at 4°C for pIGF-1R (Abcam; Cambridge, MD), IGF-1R (Santa Cruz), pSTAT3 (Cell Signaling; Danvers, MD), STAT3 (Santa Cruz), pEIF4E (Santa Cruz), eIF4E (Cell Signaling), pSMAD3 (Abcam), pPKC (Abcam), PKC (Abcam), pSRC (Cell Signaling), SRC (Cell Signaling) and SMAD3 (Abcam). Sequentially, slides were washed and incubated with the secondary antibody EnVision Dual Link (DAKO; Carpinteria, CA). Slides were then developed with 3,3'-diaminobenzidine tetrahydrochloride substrate that includes horseradish peroxidase enzyme and hematoxylin was used for counter staining. Staining was evaluated and scored by HMA. Photomicrographs were captured using a Nikon Microphot FXA microscope (Nikon Instruments; Melville, NJ), an Olympus DP70 camera (Olympus America; Jupiter, FL), and the QCapture Suite PLUS software (QImaging; Surrey, British Columbia, CA).

## Statistical analyses

RPPA and gene expression profiling data were median-centered. Principal component analysis was used to check for a batch effect and feature-by-feature two-sample t-tests were used to assess differences between treatment and control groups. We also used feature-by-feature one-way analysis of variance (ANOVA) followed by the Tukey test to perform pair comparisons for all groups. Beta-uniform mixture models were used to fit the resulting  $p$  value distributions to adjust for multiple comparisons. The cutoff  $p$  values and number of significant proteins were computed for several different false discovery rates (FDRs).

Biostatistical analyses comparing two groups were performed using an unpaired t-test with Gaussian distribution followed by the Welch correction. To distinguish between treatment groups, we used one-way ANOVA with the Geisser-Greenhouse correction. Differences with  $p$  values  $<0.05$  were considered significant. Within clustered image maps (CIM), unsupervised double hierarchical clustering used the Pearson correlation distance and Ward's linkage method as the clustering algorithm to link entities (proteins or genes) and samples.

**Supplementary Table 1.** Therapeutic enhancement of dalotuzumab and ridaforolimus in Ewing sarcoma xenografts

| XENOGRAFT | TUMOR GROWTH DELAY (DAYS) & *P-VALUE<br>(TREATMENT VS. CONTROL) |               |                       | *P-VALUE<br>TREATMENT VS. TREATMENT |                                |                                  | THERAPEUTIC<br>ENHANCEMENT |
|-----------|-----------------------------------------------------------------|---------------|-----------------------|-------------------------------------|--------------------------------|----------------------------------|----------------------------|
|           | Dalotuzumab                                                     | Ridaforolimus | Combination           | Combination Vs.<br>Ridaforolimus    | Combination Vs.<br>Dalotuzumab | Dalotuzumab Vs.<br>Ridaforolimus |                            |
| EW5       | 16<br>p=.02                                                     | 13<br>p=.06   | Not Reached<br>p=.009 | p=.02                               | p=.02                          | p=.55                            | Yes                        |
| TC71      | 1<br>p=.31                                                      | 5.5<br>p=.01  | 30<br>p=.005          | p=.006                              | p=.005                         | p=.02                            | Yes                        |

\* p values were obtained using the log-rank (Mantel-Cox) test.

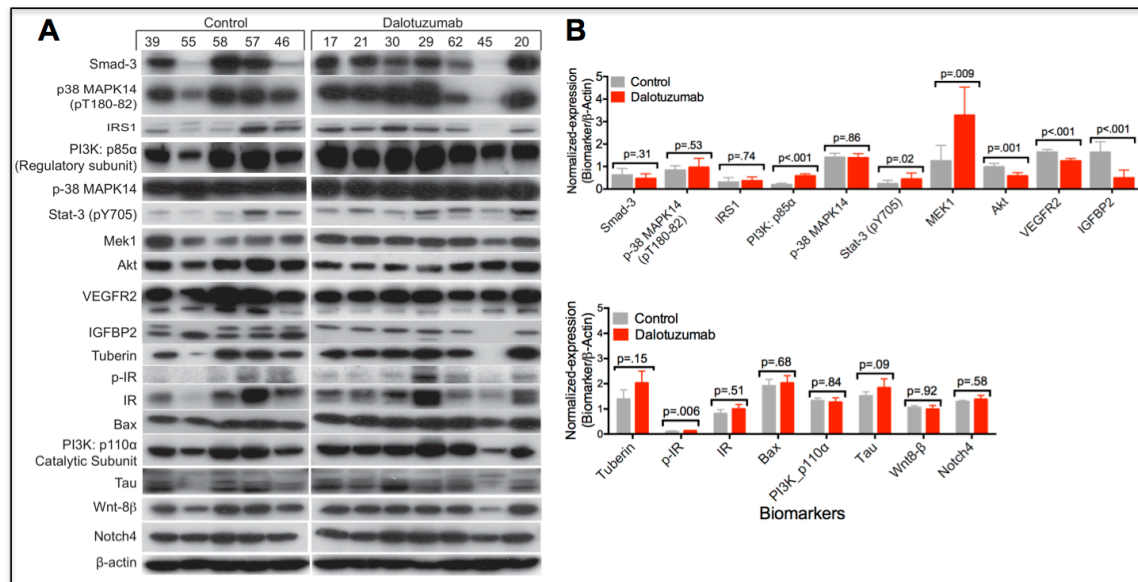

**Supplementary Figure 1. MOR and cell signaling analyses following dalotuzumab treatment in ES xenografts. (A)** Western blot validation of proteins differentially identified by RPPA in Figure 2D within dalotuzumab-treated (n=7) and control (n=5) xenografts. **(B)** Normalized protein expressions relative to β-actin in dalotuzumab-treated and control xenografts with their respective p-value using unpaired two-tailed Student test statistical analyses; bars show mean ± SD. MOR = mechanism of resistance

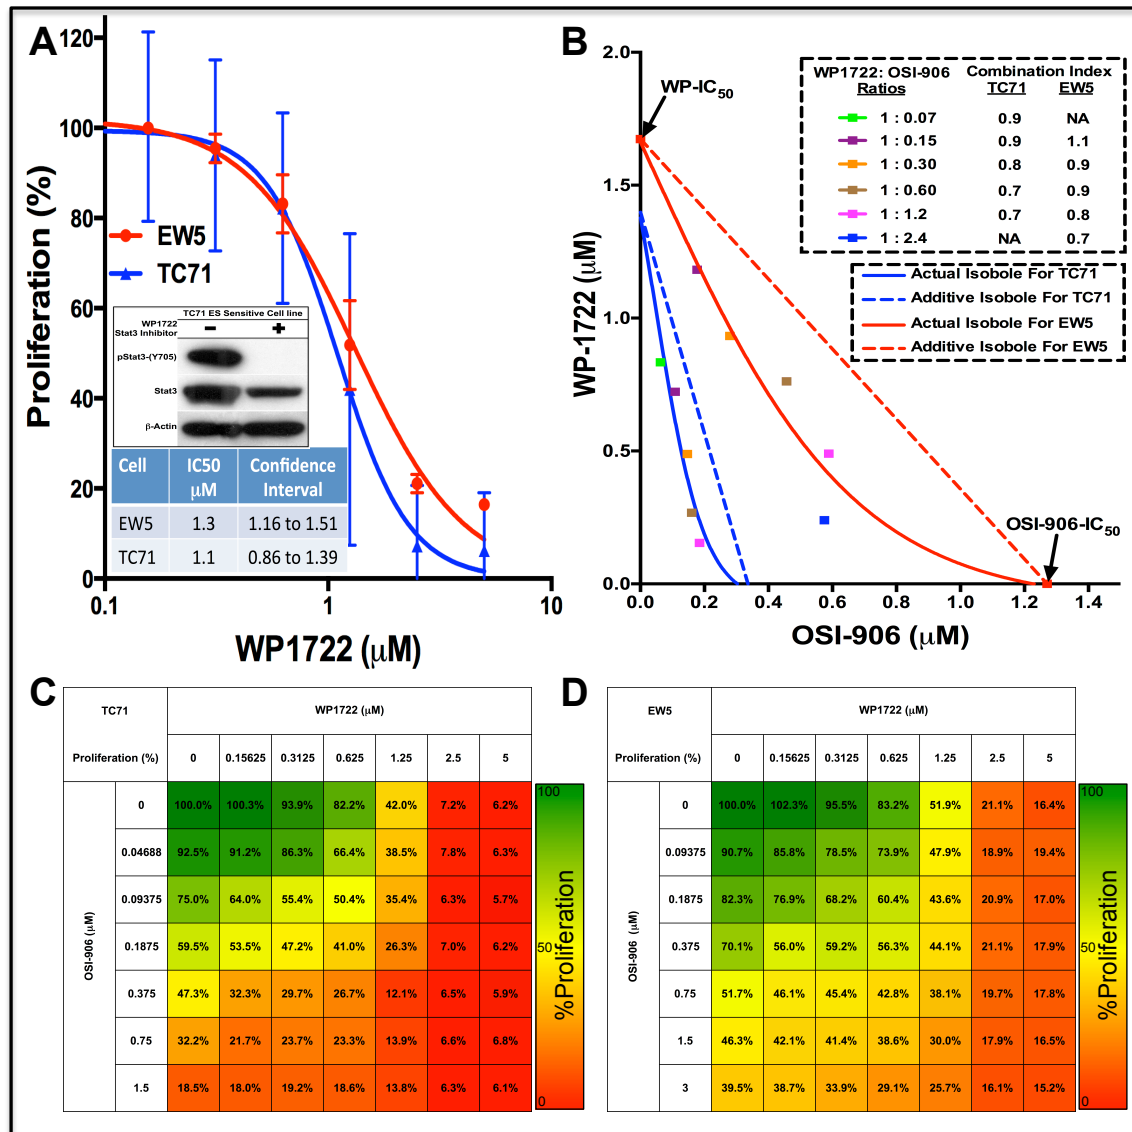

**Supplementary Figure 2. Isobologram analysis of the combination IGF-1R/IR and stat3 inhibition on in vitro EW5 and TC71 ES cell proliferation.** (A) In vitro Cell proliferation based-assay after 72 hours of exposure to stat3 inhibitor, WP-1722 in ES cell lines. The IC<sub>50</sub> values of each EW5 and TC71 drug-sensitive parental ES cell lines and pStat3-Y705/Stat3/b-actin protein expression levels in ES TC71 cell line are also shown; bars show mean  $\pm$  SD. (B) Isobologram analysis showed that OSI-906 and WP1722 are synergistic in their ability to inhibit EW5 and TC71 cell proliferation. The diagonal, dotted line indicated additivity extrapolated from single agent IC<sub>50</sub> doses of OSI-906 or WP1722 and the solid curve with colored symbols shows dose requirements at different WP1722:OSI-906 ratios to achieve 50% inhibition of EW5 and TC71 ES cell proliferation. Combination index (CI) values are given for each ratio. (C&D) Dose response effect of OSI-906 and/or WP-1722 in the TC71 (C) and EW5 (D) ES cell proliferation. Each data point in panels C&D is the mean of three replicates from three different experiments. Each data point in C and D are the mean of nine replicates from three different experiments.

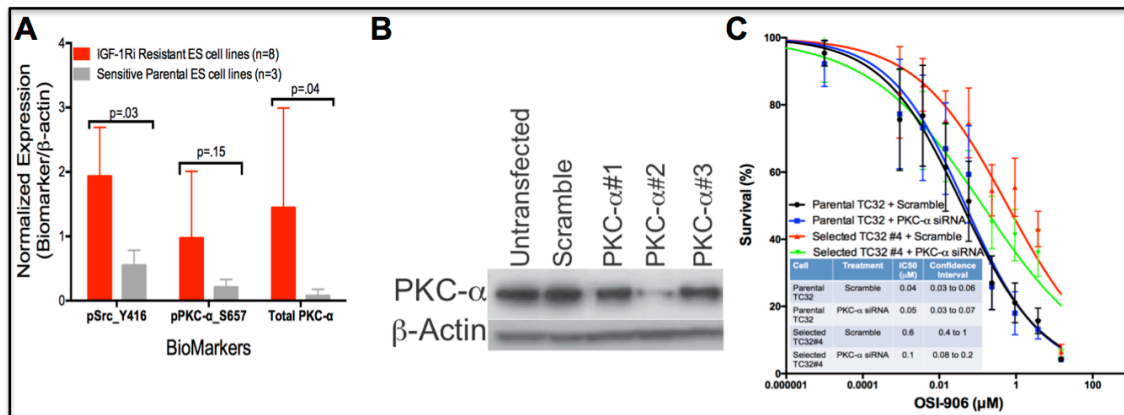

**Supplemental Figure 3. Combination effect of IGF-1R/IR and PKC- $\alpha$  blockades on in vitro ES cell survival.** (A) Western blot validation of proteins differentially identified by RPPA in Figure 4A between resistant and sensitive ES cell lines to IGF-1R blockade after  $\beta$ -actin normalization. Respective p-value using unpaired two-tailed Student test statistical analyses are also shown; bars show mean  $\pm$  SD. (B) Western blot of PKC- $\alpha$  and  $\beta$ -Actin expression in parental TC32 ES cell line (untransfected, transfected with PKC- $\alpha$  siRNA gene silencer sequences (PKC- $\alpha$ #1-3), and siRNA with nonsense/scrambled negative sequence). (C) Cell proliferation assay: OSI-906-sensitive parental cells and OSI-906-resistant clones were transiently transfected with PKC- $\alpha$ #2 siRNA (capable of knocking down the PKC- $\alpha$  expression) for 72 hours. Cell survival was assessed using the CellTiter-Blue assay. Curves represent the mean values of nine replicates from three different experiments, and bars represent standard deviations. The OSI-906 IC<sub>50</sub> values for each drug-sensitive parental cell line and selected drug-resistant cell lines, along with the associated confidence intervals, are also shown; bars show mean  $\pm$  SD. ES = Ewing sarcoma; pSrc\_Y416 = phospho-Sarc tyrosine kinase; PKC- $\alpha$  = protein kinas C alpha; IC<sub>50</sub> = half maximal inhibitory concentration; IGF-1Ri = Insulin-like growth factor 1 receptor inhibition, siRNA = small interfering RNA.

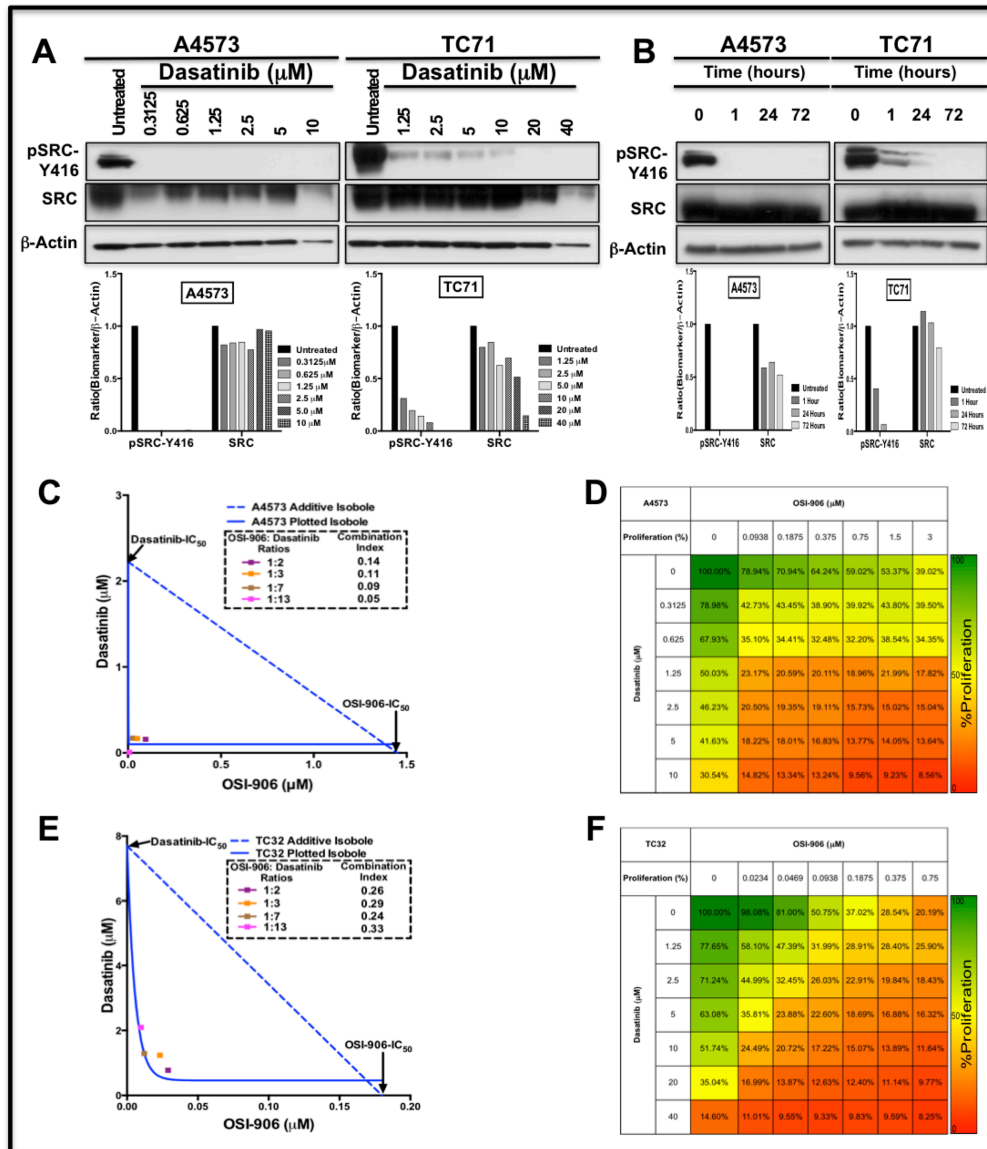

**Supplementary Figure 4. In vitro combination of IGF-1R/IR and Src blockade on ES cell survival.** Western blots showed inhibition of pSrc-Y416 and total Src expression by dasatinib in dose (A) and time (B) dependent manner (3 $\mu\text{M}$  of dasatinib) in A4573 and TC71 ES cell lines (C&E, respectively). Isobologram analysis indicates that OSI-906 and dasatinib synergistically inhibit A4573 and TC32 ES cell line proliferation. The diagonal, dotted line indicates additivity extrapolated from single agent IC<sub>50</sub> doses of OSI-906 or dasatinib and the solid curve with colored symbols shows dose requirements at different OSI-906:Dasatinib ratios necessary to achieve 50% inhibition of A4573 and TC32 ES cell proliferation. Combination index (CI) values are given for each ratio, with synergism <1, additivity =1, and antagonism >1. (D&F) Dose response effect of OSI-906 and/or dasatinib in the A4573 and TC32 ES cell proliferation. Each data point in panels C-F is the mean of nine replicates from three different experiments. IGF-1R = Insulin-like growth factor 1 receptor; IR = insulin receptor; Src, Src tyrosine kinase; ES = Ewing sarcoma; IC<sub>50</sub> = half maximal inhibitory concentration.

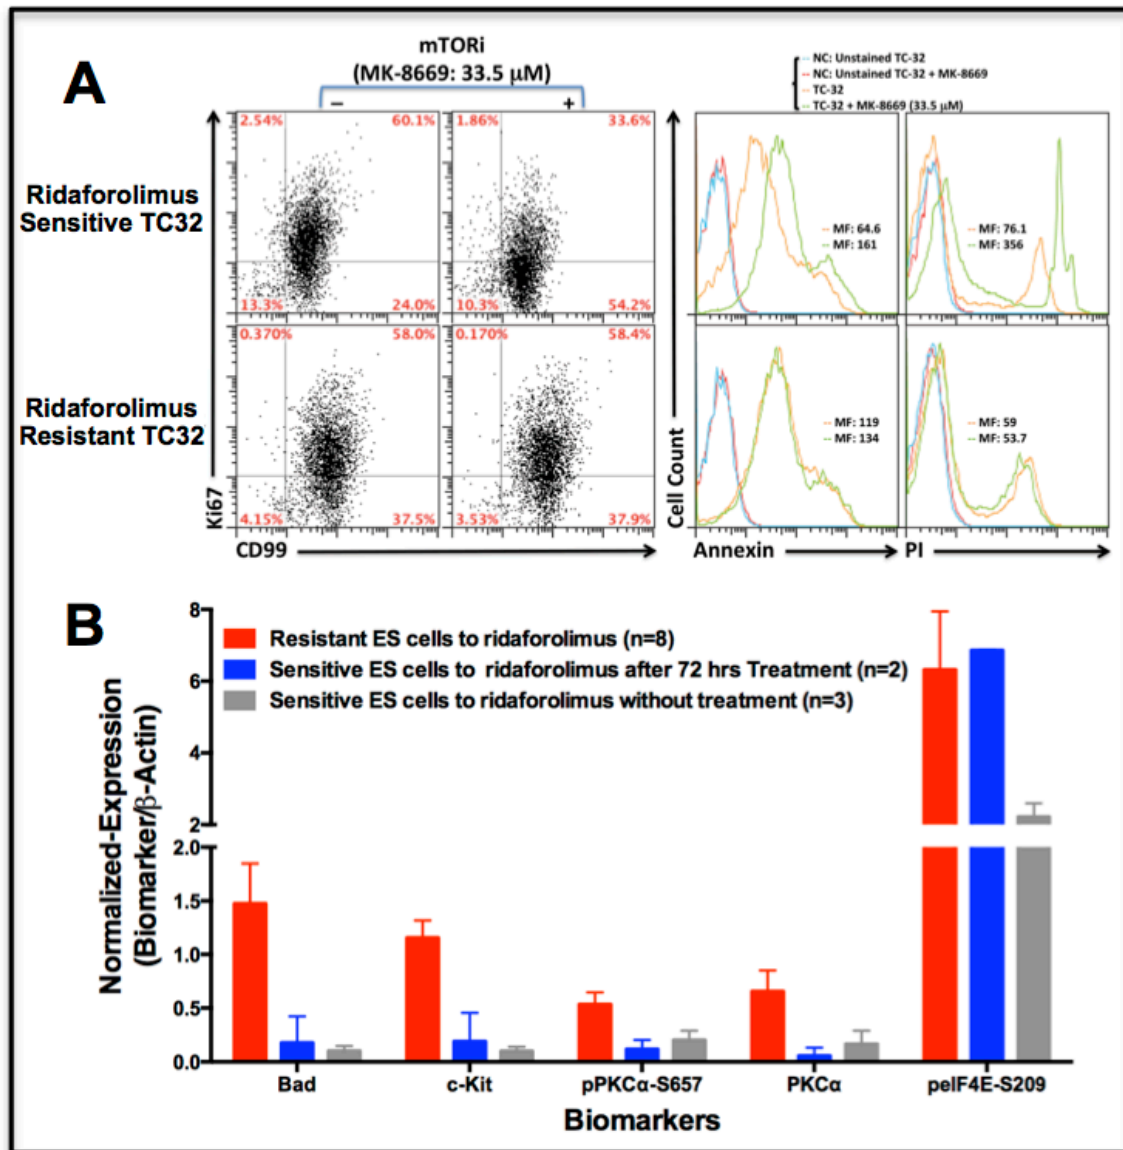

**Supplementary Figure 5. Characterization of mTORi-resistant ES cells.** (A) Seventy-two hours after MK-8669 treatment (33.5  $\mu$ M), using Ki67 labelling, propidium iodide and Annexin V staining, and flow cytometry. (B) Western blot validation of proteins differentially identified by RPPA in Figure 5A after  $\beta$ -actin normalization; bars show mean  $\pm$  SD. ES = Ewing sarcoma; mTORi = mammalian target of rapamycin inhibition; Ki67 = antigen that is a nuclear protein associated with cellular proliferation; CD99 = Cluster of differentiation 99; NC = negative control; MF = mean fluorescence; Bad = Bcl-2-associated death promoter; c-Kit = tyrosine-protein kinase Kit (CD117); PKC $\alpha$  = protein kinase C alpha; peIF4E-S209 = phospho eukaryotic translation initiation factor 4E.



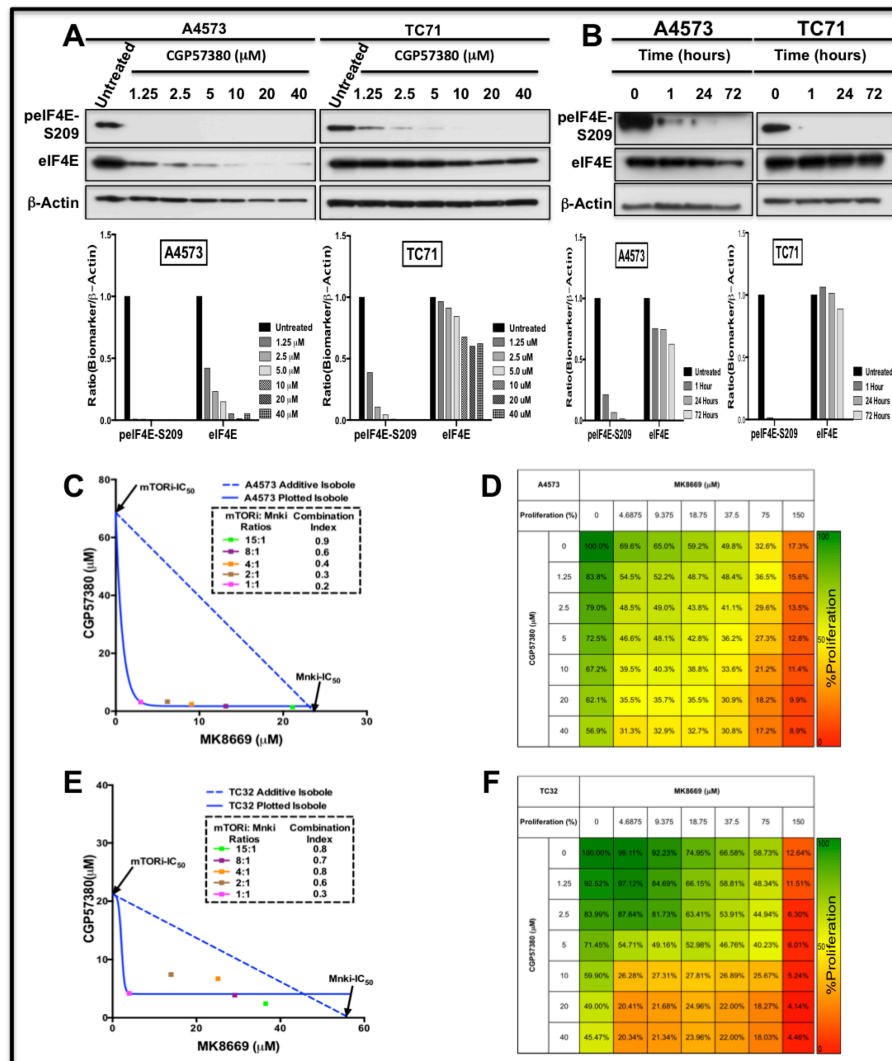

**Supplementary Figure 6. In vitro combination of mTOR and Mnk blockade on ES cell proliferation.** Western blot analyses of pEIF4E-S209, total EIF4E and  $\beta$ -Actin expression after in vitro CGP57380 (Mnk inhibitor) treatment in dose (A) and time (B) dependent manner of A4573 (15  $\mu$ M of CGP57380) and TC71 (10  $\mu$ M of CGP57380) ES cell lines; normalized EIF4E and pEIF4E-S209 protein expression is relative to  $\beta$ -Actin. (C&E) Isobologram analysis showed that ridaforolimus (MK-8669) and CGP57380 are synergistic in their ability to inhibit A4573 and TC32 cell proliferation. The diagonal, dotted line indicates additivity extrapolated from single agent IC<sub>50</sub> doses of ridaforolimus or CGP57380 and the solid curve with colored symbols shows dose requirements at different ridaforolimus:CGP57380 ratios to achieve 50% inhibition of A4573 and TC32 ES cell proliferation. Combination index (CI) values are given for each ratio, with synergism <1, additivity =1, and antagonism >1. (D&F) Dose response effect of ridaforolimus and/or CGP57380 in the A4573 and TC32 ES cell proliferation. Each data point in panels D&F is the mean of nine replicates from three different experiments. mTORi = mammalian target of rapamycin inhibition; Mnk1 = MAPK interacting protein kinase inhibition; EIF4E-S209 = eukaryotic translation initiation factor 4E.

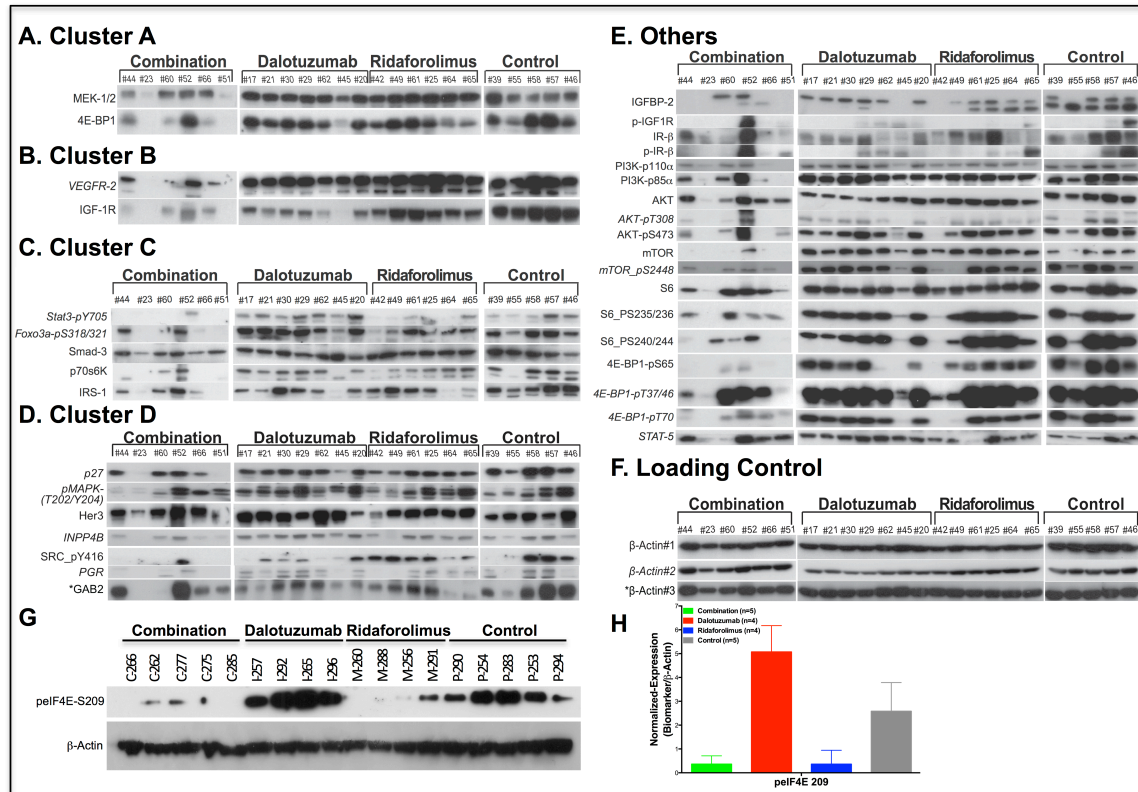

**Supplementary Figure 7. (A-F)** Western blot validation of proteins identified by RPPA in Figure 6B. **(G)** peIF4E-S209 and  $\beta$ -Actin protein expressions in treated xenografts presented in Figure 1C. **(H)** Normalized peIF4E-S209 protein relative to  $\beta$ -actin in treated xenografts shown in Figure 1C; bars show mean  $\pm$  SD. Abbreviated gene of the indicated protein is provided in the supplementary table of proteins analyzed in RPPA.

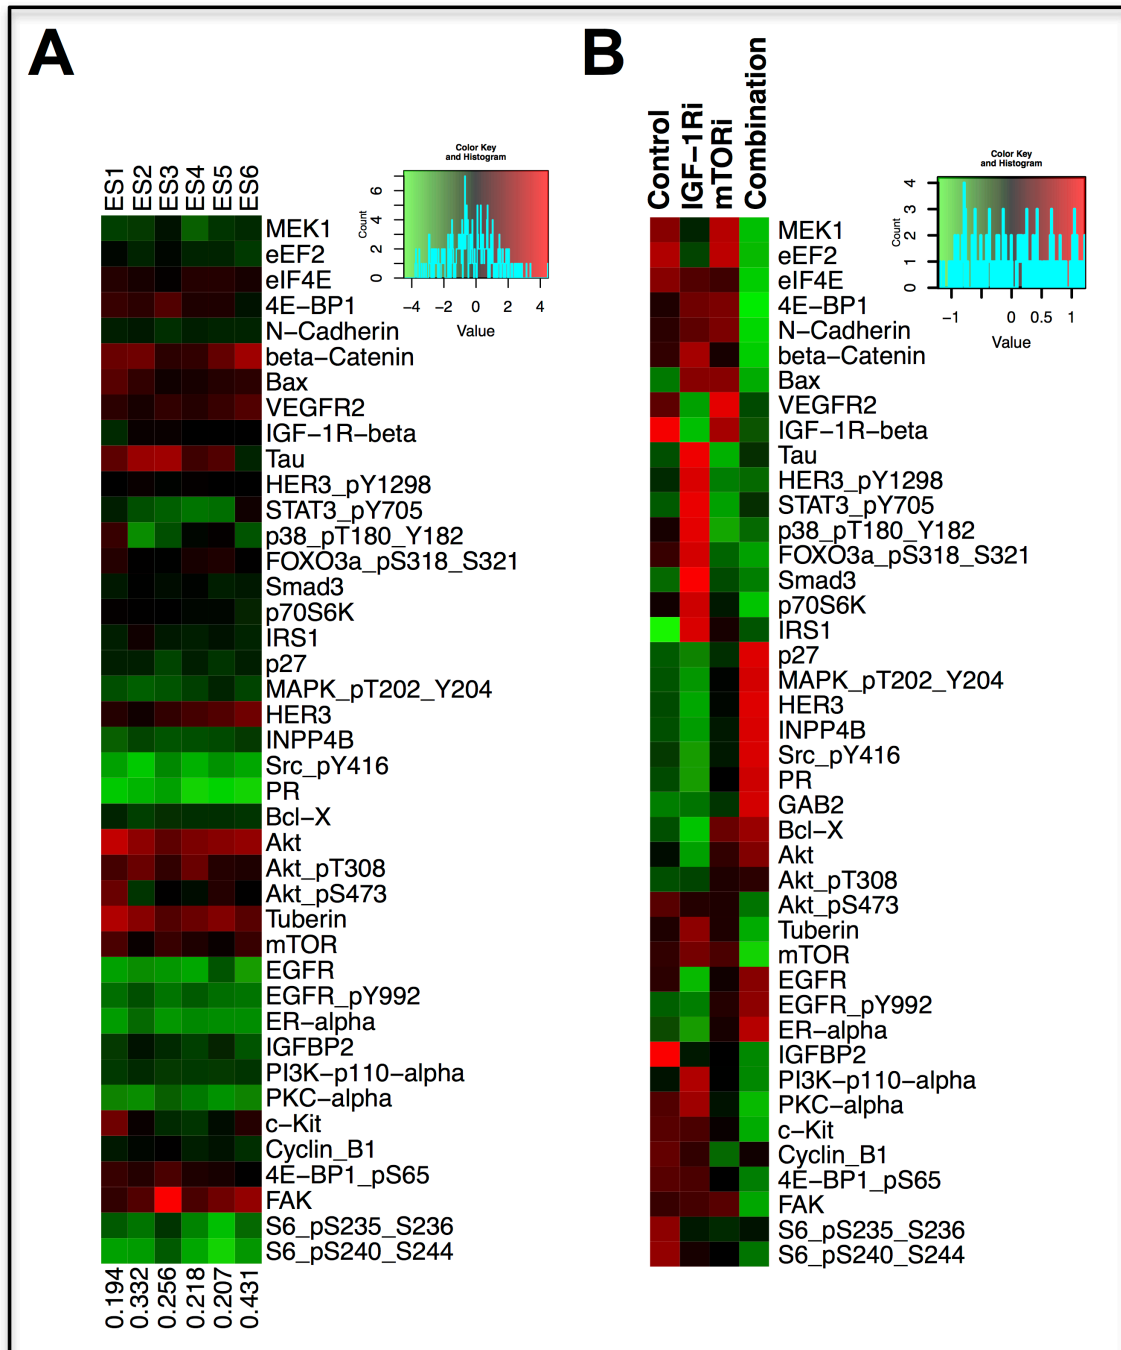

**Supplementary Figure 8.** RPPA profiling of pretreated ES patient tumors (**A**) and averaged EW5 xenografts treated mice (**B**). The Pearson correlation coefficients between the pretreated patient tumors and the averaged xenograft control group are provided in the bottom of the figure 8A. Abbreviated gene of the indicated protein is provided in the supplementary table of proteins analyzed in RPPA.
